# Supplementary material
Source: Springer Nature journal article supplement (https://www.springermedizin.de/resource/supplementary/12889_2009_2339_MOESM3_ESM.pdf/9485446)

# Demands: mean scale values by working hours per week

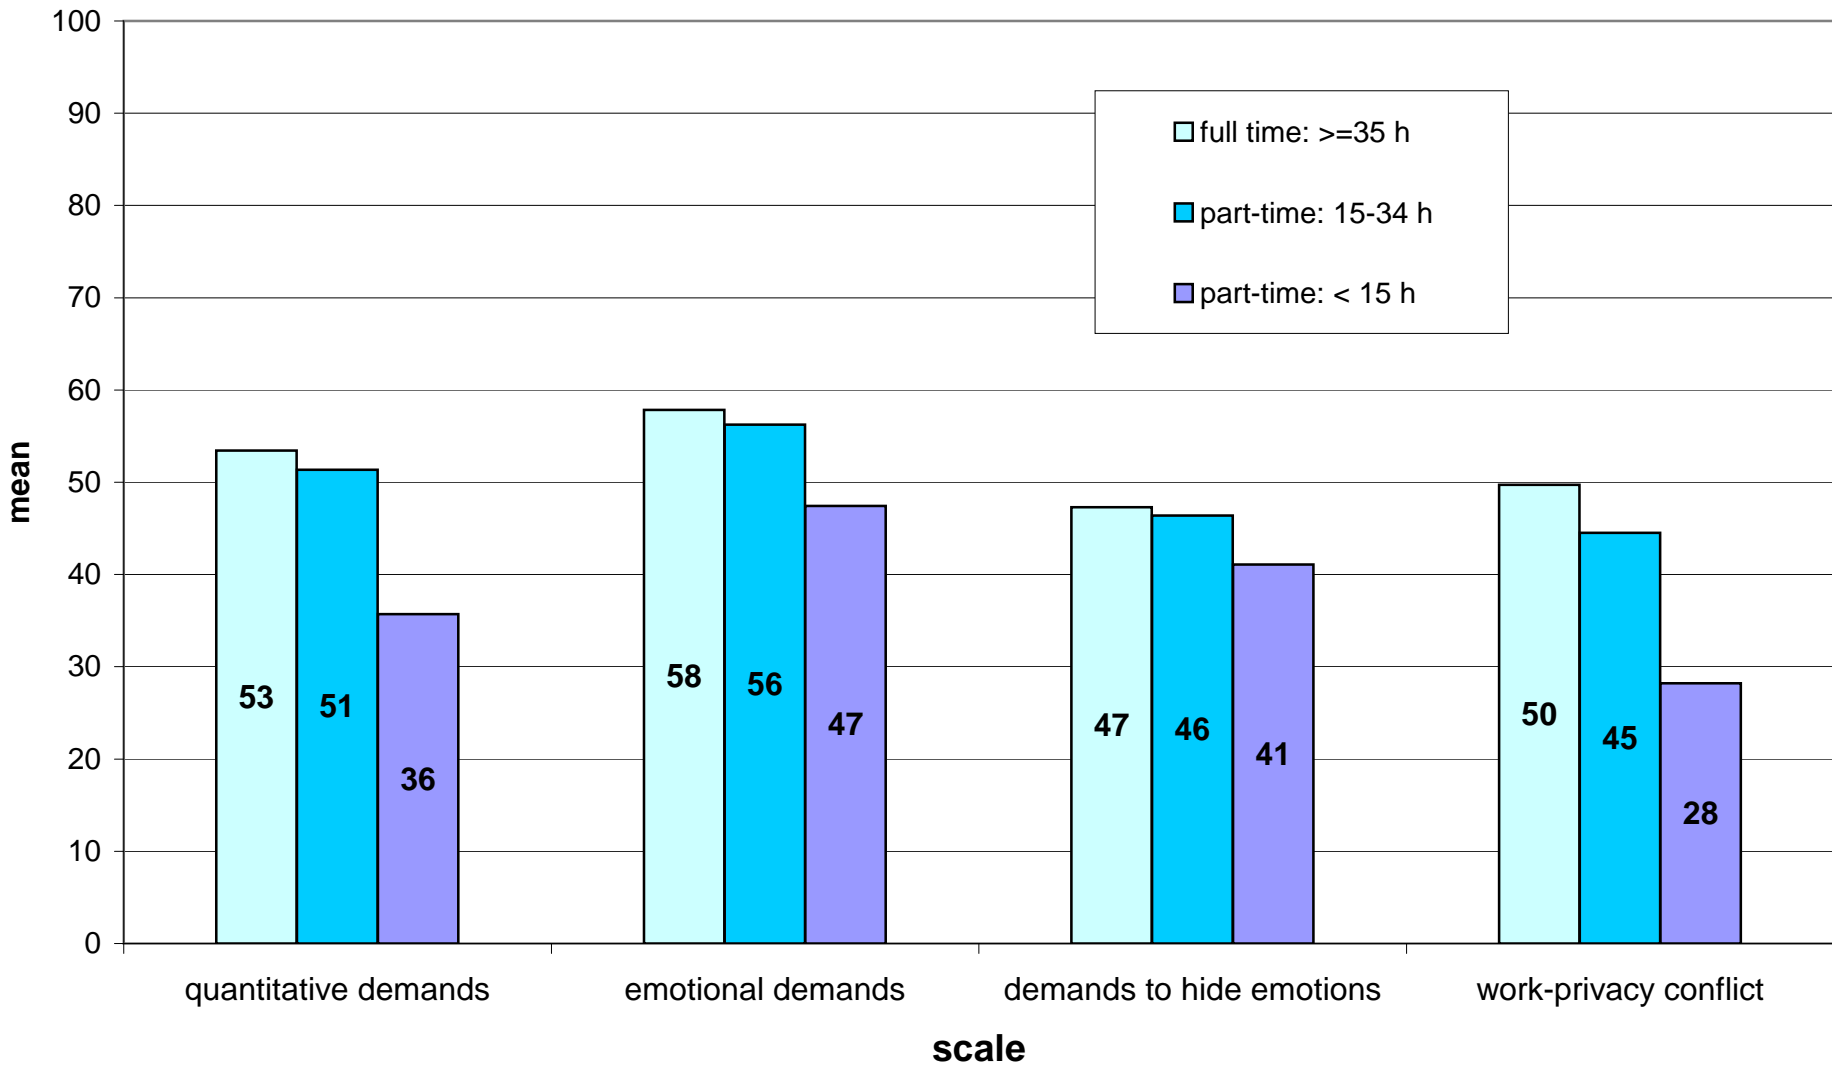

Supplement: MOESM3 [file 9485446]
